# Supplementary material for: Nitric acid-induced surface disordering on ice
Source: Royal Society of Chemistry journal article supplement (doi:10.1039/c3cp50487e), 2013-01-01
Supplement: c3cp50487e.pdf [file c3cp50487e.pdf]

# Nitric acid-induced surface disordering on ice

## *Supporting Information*

*Samar G. Moussa†, Min H. Kuo, V. Faye McNeill\**

Department of Chemical Engineering, Columbia University, New York, New York  
10027

† Current Address: Atmospheric Science and Technology Directorate, Science and Technology  
Branch, Environment Canada, 4905 Dufferin Street, Toronto, Ontario.

Author to whom correspondence should be addressed: [vfm2103@columbia.edu](mailto:vfm2103@columbia.edu); phone (212)  
854-2869; FAX (212) 854-3054

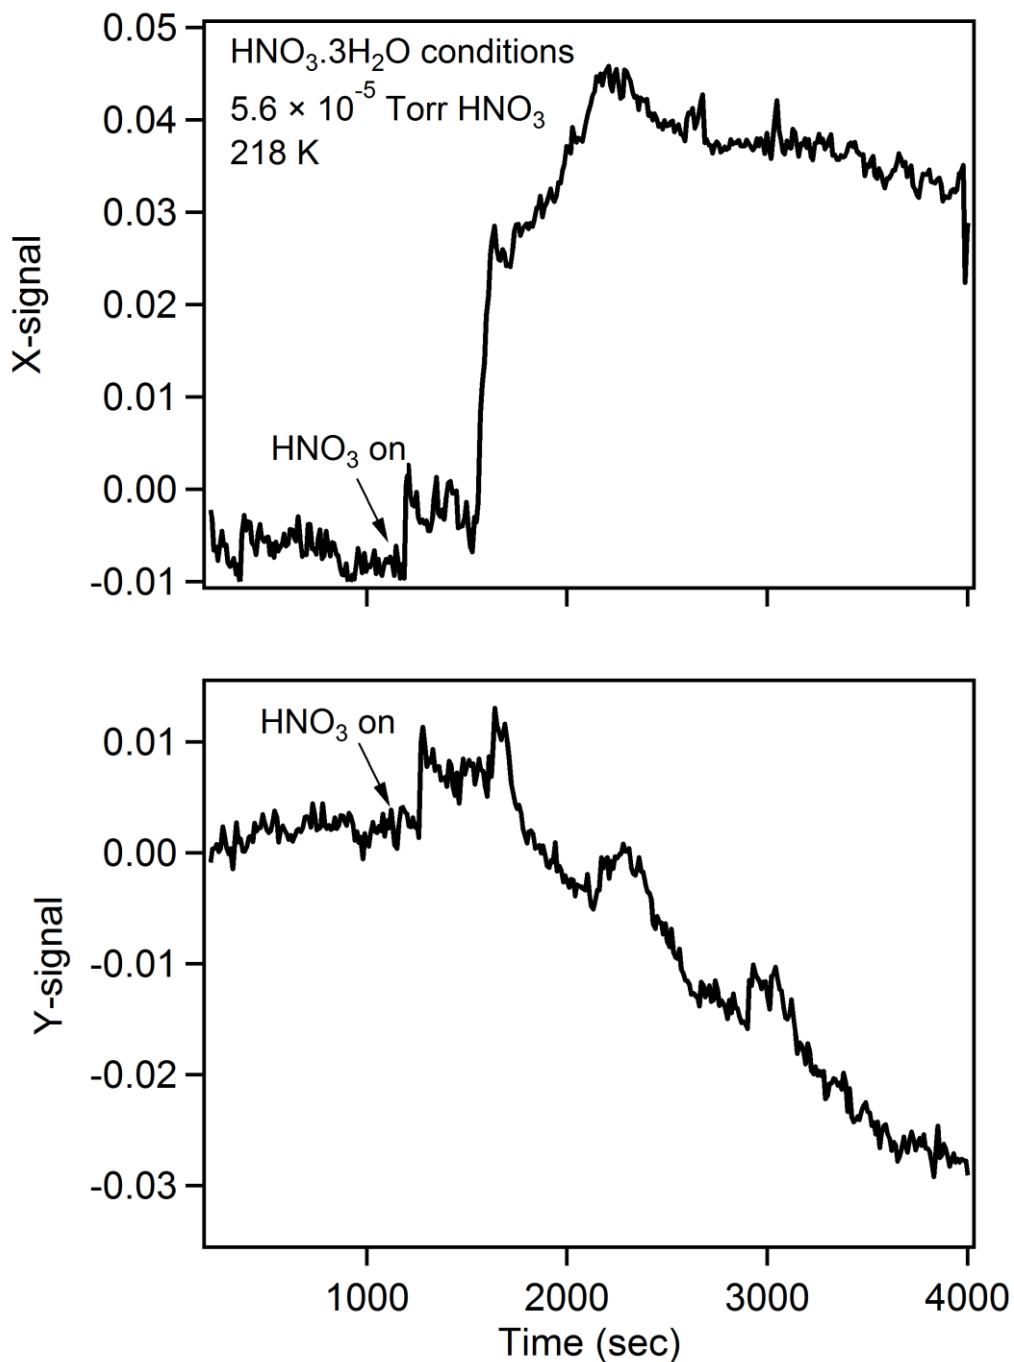

**Figure S1:** Time study of phase-modulated ellipsometry signals for a constant-temperature experiment in the hydrate regime of the HNO<sub>3</sub>-ice phase diagram. Top panel is the x-signal and the bottom panel is the y-signal.

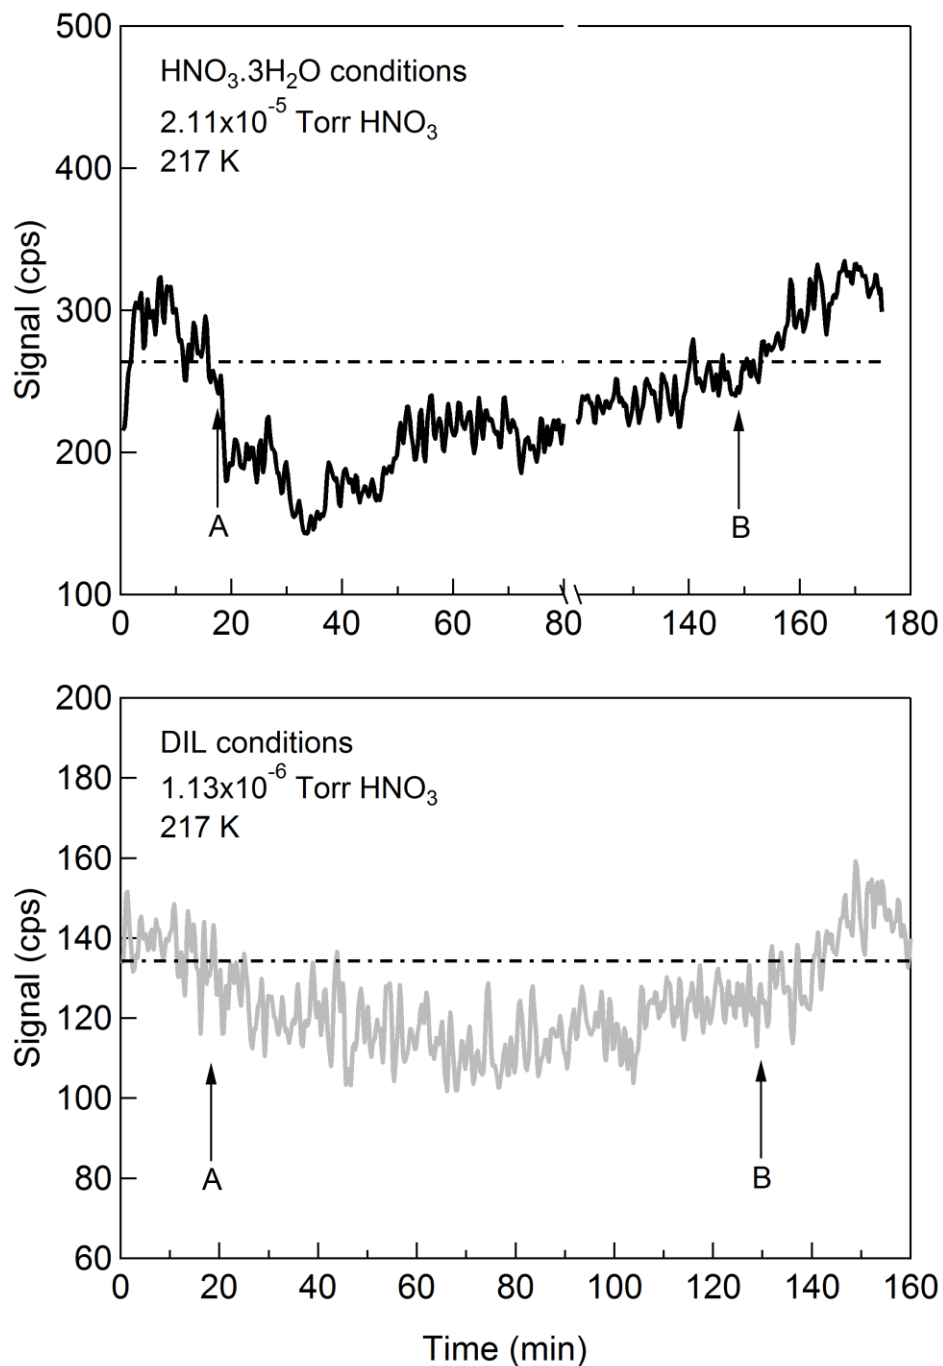

**Figure S2:** HNO<sub>3</sub> CIMS signal (HF·NO<sub>3</sub><sup>-</sup> peak at m/z 82) for an experiment under hydrate formation conditions (top) and another in which HNO<sub>3</sub>-induced DIL was detected using ellipsometry (bottom).
